# Supplementary material for: Bitter Taste Receptors Expression in Human Granulosa and Cumulus Cells: New Perspectives in Female Fertility
Source: MDPI journal article supplement (doi:10.3390/cells10113127), 2021-11-11
Supplement: s1 [file s1]

**Table S1.** PrimePCRddPCR Gene Expression Probe Assays, specific for ddPCR.

| Target Genes                                                       | Acronym                        | ID assay Probe  |
|--------------------------------------------------------------------|--------------------------------|-----------------|
| <i>Taste receptor, type 2, member 3</i>                            | <i>TAS2R3</i>                  | dHsaCPE5028212  |
| <i>Taste receptor, type 2, member 4</i>                            | <i>TAS2R4</i>                  | dHsaCPE5028214  |
| <i>Taste receptor, type 2, member 14</i>                           | <i>TAS2R14</i>                 | dHsaCPE5043852  |
| <i>Taste receptor, type 2, member 19</i>                           | <i>TAS2R19</i>                 | dHsaCPE5027704  |
| <i>Taste receptor, type 2, member 43</i>                           | <i>TAS2R43</i>                 | dHsaCPE5192389  |
| <i>G protein subunit alpha transducin 1</i>                        | <i>GNAT1</i>                   | dHsaCPE5025595  |
| <i>G protein subunit alpha transducin 3</i>                        | <i>GNAT3</i>                   | dHsaCPE5043953  |
| <i>Phosphodiesterase 4A, cAMP-specific</i>                         | <i>PDE4A</i>                   | dHsaCPE5046851  |
| <i>Phospholipase C, beta 2</i>                                     | <i>PLCB2</i>                   | dHsaCPE5047389  |
| <i>Transient receptor potential channel, subfamily M, member 5</i> | <i>TRPM5</i>                   | dHsaCPE5032805  |
| <i>Signal Transducer And Activator Of Transcription 5A</i>         | <i>STAT5A</i>                  | dHsaCPE5026004  |
| <i>Signal Transducer And Activator Of Transcription 5b</i>         | <i>STAT5B</i>                  | dRnoCPE5167406  |
| <i>Peroxisome proliferator-activated receptor gamma</i>            | <i>PPAR<math>\gamma</math></i> | dHsaCPE5036470  |
| <i>GA Binding Protein Transcription Factor Subunit Alpha</i>       | <i>GABPa</i>                   | dHsaEG5016715   |
| <i>Androgen Receptor</i>                                           | <i>AR</i>                      | dHsaCPE54526914 |
| Reference Genes                                                    | Acronym                        | ID assay Probe  |
| <i>Hypoxanthine-Guanine Phosphoribosyl Transferase 1</i>           | <i>HPRT1</i>                   | dHsaCPE5192871  |
| <i>Tata Binding Protein</i>                                        | <i>TBP</i>                     | dHsaCPE5058363  |
| <i>Peptidylprolyl isomerase B (cyclophilin B)</i>                  | <i>PPIB</i>                    | dHsaCPE5055049  |

**Table S2.** List of antibodies used in this study.

| Antigen              | Donor species | Dilution |        | Manufacturer             | RRID        |
|----------------------|---------------|----------|--------|--------------------------|-------------|
|                      |               | IF       | WB     |                          |             |
| Primary antibodies   |               |          |        |                          |             |
| β-Actin              | Mouse         | /        | 1:2000 | Bio-Rad Laboratories     | AB_2223350  |
| α-Gustducin          | Rabbit        | 1:100    | 1:500  | Santa Cruz               | AB_673678   |
| α-Transducin         | Rabbit        | 1:100    | 1:500  | Santa Cruz               | AB_2279097  |
| TAS2R3               | Rabbit        | 1:100    | 1:500  | Thermo Fisher Scientific | AB_2556263  |
| TAS2R4               | Rabbit        | 1:100    | 1:500  | Thermo Fisher Scientific | AB_2201090  |
| TAS2R14              | Rabbit        | 1:100    | 1:500  | Novusbio Laboratories    | AB_11053160 |
| TAS2R19              | Rabbit        | 1:300    | 1:1000 | Thermo Fisher Scientific | AB_962285   |
| TAS2R43              | Rabbit        | 1:300    | 1:1000 | Thermo Fisher Scientific | AB_2815963  |
| Secondary antibodies |               |          |        |                          |             |
| Anti-Rabbit-IgG FITC | Goat          | 1:2000   | -      | Bio-Rad Laboratories     | AB_1163662  |
| Anti-Mouse-IgG HRP   | Goat          | -        | 1:8000 | Bio-Rad Laboratories     | AB_609692   |
| Anti-Rabbit-IgG HRP  | Goat          | -        | 1:8000 | Bio-Rad Laboratories     | AB_1102634  |

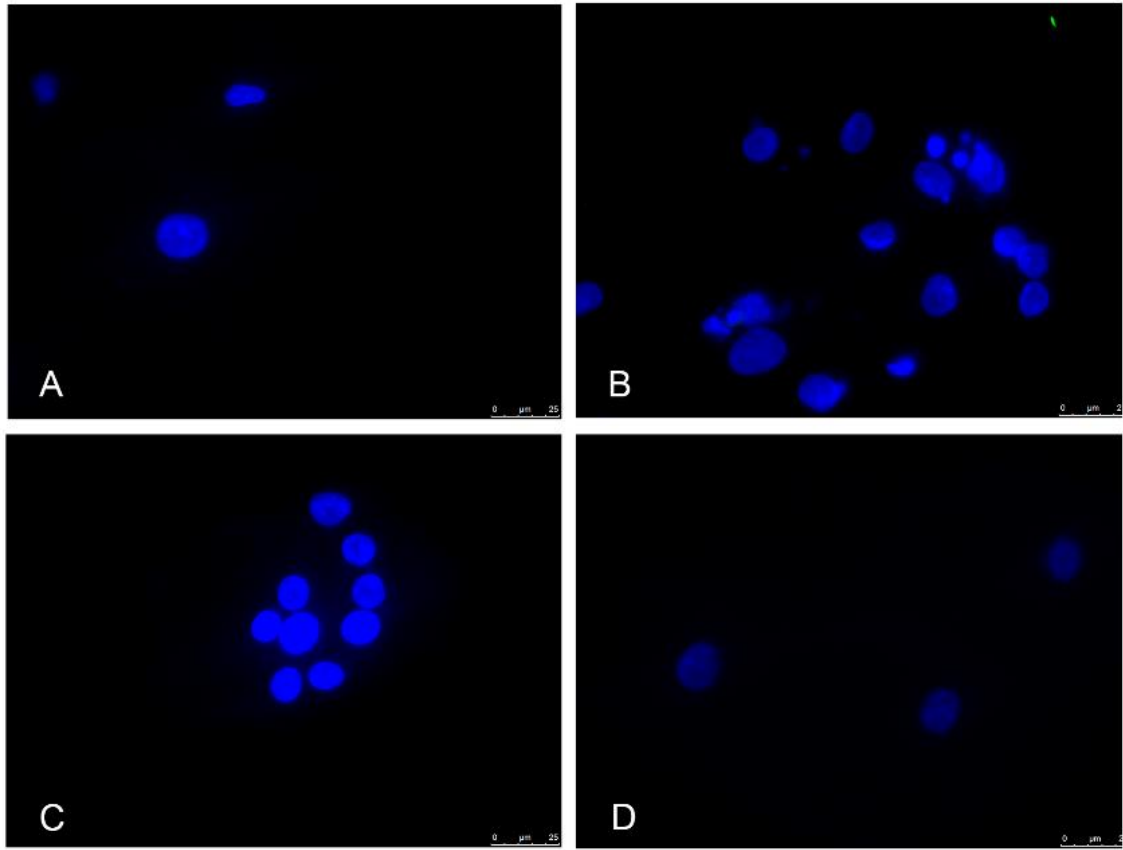

**Figure S1.** Representative images of negative controls for the immunofluorescent staining of GCs (A,C) and CCs (B,D) showed in Figure 4 and Figure 7. Bar = 25µm.
